1 **Short title:** COP1 destabilizes RGL2 to promote seed germination.

2 **Author for contact:** Sandra Fonseca ([sfonseca@cnb.csic.es](mailto:sfonseca@cnb.csic.es))

3 **Article Title:**

4 **COP1 promotes seed germination by destabilizing RGA-LIKE2**  
5 **(RGL2) in Arabidopsis**

6

7 **Byoung-Doo Lee<sup>1,3</sup>, Yehyun Yim<sup>1,3</sup>, Esther Cañibano<sup>2,3</sup>, Suk-Hwan Kim<sup>1</sup>, Marta García-**  
8 **León<sup>2</sup>, Vicente Rubio<sup>2</sup>, Sandra Fonseca<sup>2\*</sup> and Nam-Chon Paek<sup>1,\*</sup>**

9 <sup>1</sup>Department of Plant Science, Plant Genomics and Breeding Institute, Research Institute of  
10 Agriculture and Life Sciences, Seoul National University, Seoul 08826, Republic of Korea.

11 <sup>2</sup>Departamento de Genética Molecular de Plantas, Centro Nacional de Biotecnología (CNB-  
12 CSIC), Madrid, Spain.

13 <sup>3</sup>These authors contributed equally to this work.

14 \*Authors for correspondence: Sandra Fonseca ([sfonseca@cnb.csic.es](mailto:sfonseca@cnb.csic.es); 0034 91 585 4681),  
15 Nam-Chon Paek ([ncpaek@snu.ac.kr](mailto:ncpaek@snu.ac.kr); 0082 2 880 4543)

16

17 **Author Contributions** B.-D.L., and N.-C.P. designed the research and conceived the study.  
18 B.-D.L., Y.Y., E.C., S.-H.K., M.G-L., and V.R. performed experiments. B.-D.L., E.C., V.R.,  
19 S.F., and N.-C.P. discussed the results and redesigned experiments, B.-D.L., S.F. and N.-  
20 C.P wrote the paper.

21

22 **One sentence summary:** COP1 positively regulates germination in Arabidopsis seeds by  
23 directly ubiquitinating and promoting the degradation of RGL2, a key repressor of seed  
24 germination.

25

26 **Funding:** This research was supported by the Basic Science Research Program of the  
27 National Research Foundation (NRF) of Korea (NRF-2017R1A2B3003310 to N.-C.P.),  
28 Republic of Korea. S.F. has a Ramon y Cajal (RYC-2014-16308) grant funded by the  
29 Ministerio de Economía y Competitividad. Work in V.R.'s and S.F.'s laboratory is funded

30 by the Agencia Estatal de Investigación/Fondo Europeo de Desarrollo Regional/European  
31 Union (BIO2016-80551-R; PID2019-105495GB-I00).

32

### 33 **Abstract**

34 Under favorable moisture, temperature and light conditions, gibberellin (GA) biosynthesis is  
35 induced and triggers seed germination. A major mechanism by which GA promotes seed  
36 germination is by promoting the degradation of the DELLA protein RGL2, a major repressor  
37 of germination in *Arabidopsis* seeds. Analysis of seed germination phenotypes of  
38 *constitutively photomorphogenic 1 (cop1)* mutants and complemented *COP1-OX/cop1-4*  
39 lines in response to GA and paclobutrazol (PAC) suggested a positive role for COP1 in seed  
40 germination and a relation with GA signaling. *cop1-4* mutant seeds showed PAC  
41 hypersensitivity, but transformation with a *COP1* overexpression construct rendered them  
42 PAC insensitive, with a phenotype similar to that of *rgl2* mutant (*rgl2-SK54*) seeds.  
43 Furthermore, *cop1-4 rgl2-SK54* double mutants showed a PAC-insensitive germination  
44 phenotype like that of *rgl2-SK54*, identifying COP1 as an upstream negative regulator of  
45 RGL2. COP1 interacts directly with RGL2 and *in vivo* this interaction is strongly enhanced by  
46 SPA1. COP1 directly ubiquitinates RGL2 to promote its degradation. Moreover, GA  
47 stabilizes COP1 with consequent RGL2 destabilization. By uncovering this COP1-RGL2  
48 regulatory module, we reveal a novel mechanism whereby COP1 positively regulates seed  
49 germination and controls the expression of germination-promoting genes.

50

## 51 Introduction

52 In its seed form, a new plant generation can be dispersed and then wait to develop and  
53 grow once favorable environmental conditions, such as optimal moisture, light, and  
54 temperature, exist (Bewley, 1997). Favorable conditions trigger changes in the  
55 phytohormone levels of mature seeds, including a decrease in abscisic acid (ABA) and an  
56 increase in gibberellins (GA), which together, inhibit dormancy and promote seed  
57 germination (Steber *et al.*, 1998; Holdsworth *et al.*, 2008). Seed imbibition induces GA  
58 biosynthesis and triggers germination. *Arabidopsis* (*Arabidopsis thaliana*) mutants with  
59 impaired GA biosynthesis (e.g., *ga1-3* and *ga2*) fail to germinate in the absence of  
60 exogenous GA, underlining its importance for germination (Koornneef & van der Veen,  
61 1980).

62 GA is perceived by the receptor protein GA-INSENSITIVE DWARF 1 (GID1), which then  
63 changes conformation and binds to DELLA proteins, central repressors in the GA signaling  
64 pathway (Ueguchi-Tanaka *et al.*, 2005; Murase *et al.*, 2008; Shimada *et al.*, 2008). The  
65 formation of the GID1-GA-DELLA complex triggers GA-mediated DELLA degradation by the  
66 F-box protein SLEEPY1 (SLY1; SCF<sup>SLY1</sup> complex) and its homolog SNEEZY1/SLY2 through  
67 ubiquitin-dependent proteolysis, and induces the expression of GA-responsive genes  
68 (McGinnis *et al.*, 2003; Dill *et al.*, 2004; Fu *et al.*, 2004; Ariizumi *et al.*, 2011). Thus, GA lifts  
69 DELLA repression of its downstream targets, triggering GA-mediated responses (Sun *et al.*,  
70 2010).

71 In *Arabidopsis*, five DELLA repressors, such as GA INSENSITIVE (GAI), REPRESSOR  
72 OF *ga1-3* (RGA), RGA-LIKE 1 (RGL1), RGL2, and RGL3, play overlapping yet distinct roles  
73 in many developmental processes, such as seed germination, stem elongation, and  
74 transition to flowering (Peng *et al.*, 1997; Dill & Sun 2001; Lee *et al.*, 2002; Wen & Chang,  
75 2002; Cao *et al.*, 2005). GAI and RGA are both involved in seed germination (Oh *et al.*,  
76 2007), but RGL2 is the major regulator of GA-mediated seed germination among the DELLA  
77 proteins. Under GA-deficient conditions, such as in the *ga1-3* mutant background or under  
78 paclobutrazol (PAC) treatment, only *rgl2* mutation, but not *rgl1* or *rgl3*, rescued seed  
79 germination rates under light conditions (Lee *et al.*, 2002; Tyler *et al.*, 2004; Cao *et al.*,  
80 2005).

81 The repressive role of RGL2 in seed germination operates through different molecular  
82 mechanisms that integrate GA, ABA, and light signals. RGL2 associates with transcription  
83 factors to regulate gene expression and control germination (Piskurewicz *et al.*, 2008; Liu *et al.*,  
84 2016; Ravindran *et al.*, 2017; Yang *et al.*, 2019; Sanchez-Montesino *et al.*, 2019).

85 Furthermore, RGL2 represses the expression of the *GA-STIMULATED ARABIDOPSIS6*  
86 (*GASA6*), which is an integrator of glucose, GA and ABA signals in seed germination (Zhong  
87 *et al.*, 2015). *GASA6* locates mainly in cell wall and regulates cell wall loosening to favor cell  
88 elongation on embryonic axis during seed germination through EXPANSIN 1 (*EXPA1*)  
89 (*Zhong et al.*, 2015).

90 Light impact on seed germination relies in part on phytochrome B (*phyB*)  
91 activation/inactivation by red/far-red light. Once activated, *phyB* promotes the degradation of  
92 PHYTOCHROME-INTERACTING FACTOR 1 (*PIF1*), a strong repressor of light-mediated  
93 seed germination (Oh *et al.*, 2004; Oh *et al.*, 2006). Thus, *pif1* mutants display high  
94 germination rates in the dark (Oh *et al.*, 2004). *PIF1* regulate germination in many ways, by  
95 directly binds to the promoters of the DELLA repressors *GAI* and *RGA* to activate their  
96 expression and repress GA signaling (Oh *et al.*, 2007); by directly repressing genes involved  
97 in GA biosynthesis and activating GA catabolism (Kim *et al.*, 2016; Oh *et al.*, 2007; Oh *et al.*,  
98 2009); by acting cooperatively with *ABI3* in the dark to activate *SOMNUS (SOM)*, a key  
99 negative regulator of seed germination; and by directly binding to the *ABI5* promoter (Park *et*  
100 *al.*, 2011; Kim *et al.*, 2008). Thus, stabilization of *PIF1* in the dark is a key to halting seed  
101 germination, as it mediates the repression and activation of the GA and ABA cascades,  
102 respectively (Oh *et al.*, 2006, 2007; Kim *et al.*, 2008).

103 Previous reports have shown that additional regulators of light signaling are involved in  
104 the control of seed germination. Among them is CONSTITUTIVELY  
105 PHOTOMORPHOGENIC 1 (*COP1*), a master regulator of photomorphogenesis. *COP1*,  
106 together with the E2 ubiquitin variant *COP10*, DE-ETIOLATED 1 (*DET1*), and *COP9*  
107 SIGNALOSOME (*CSN*) proteins, is a member of the *COP/DET/FUSCA* family, whose strong  
108 mutants produce dark-purple-pigmented seeds and exhibit seedling-lethal phenotypes  
109 (McNellis *et al.*, 1994). *COP1*, in association with SPA proteins, acts as part of a substrate  
110 adaptor module within CULLIN4 (*CUL4*)-based E3 ubiquitin ligases. The formation of  
111 *CUL4<sup>COP1-SPA</sup>* complexes mediates the targeted degradation of many positive regulators of  
112 photomorphogenesis in darkness, as well as of other regulators of circadian clock and  
113 photoperiodic flowering (Lau & Deng, 2012). In the case of seed germination, the *CUL4<sup>COP1-</sup>*  
114 *SPA* E3 ubiquitin ligase is necessary for the light-induced degradation of *PIF1* in Arabidopsis.  
115 Accordingly, *cop1* and *spaQ* mutants display reduced seed germination in response to light,  
116 consistent with the higher abundance of *PIF1* in these mutants compared to the wild-type  
117 (Zhu *et al.*, 2015). Strikingly, in the dark, *PIF1* acts as a cofactor of *CUL4<sup>COP1-SPA</sup>* E3  
118 ubiquitin ligase, enhancing its function to synergistically degrade *HY5* and repress  
119 photomorphogenesis, being then degraded in the light (Xu *et al.*, 2014; Zhu *et al.*, 2015).

120 Despite its role as a positive regulator of photomorphogenesis, HY5 binds to the *ABI5*  
121 promoter and is required for *ABI5* expression in developing seeds, positively controlling seed  
122 maturation and dormancy (Chen *et al.*, 2008). Both COP1 and HY5 proteins have been  
123 recently shown to be involved in ABA-mediated inhibition of post-germination seedling  
124 development (Yadukrish *et al.*, 2020a; Yadukrish *et al.*, 2020b).

125 Here, we provide evidence that COP1 acts as a positive regulator of seed germination  
126 by limiting the accumulation of the DELLA protein RGL2. In germination analysis, the *cop1-4*  
127 weak mutant showed a PAC-hypersensitive germination phenotype, but the *COP1*-  
128 overexpressing plants exhibited PAC insensitivity in an RGL2-dependent manner. COP1  
129 was stabilized by GA and directly interacted with and ubiquitinated RGL2 to promote its  
130 degradation, releasing the expression of downstream regulators of seed germination (such  
131 as *GASA6* and *EXPA1*). Taken together, our data suggest that COP1- and GA-mediated  
132 seed germination converges on RGL2 regulation. This finding contributes to the  
133 understanding of the regulatory role of COP1 in the germination of Arabidopsis seeds.

134

## 135 Results

### 136 COP1 is a regulator of seed germination

137 *COP1* is a member of the *COP/DET/FUS* gene family, whose strong mutants produce dark-  
138 purple-pigmented (*fusca*) seeds and exhibit a seedling-lethal phenotype (McNellis *et al.*,  
139 1994). We found that strong mutants of *COP1*, especially the *cop1-5* seedling-lethal mutant  
140 caused by a T-DNA insertion (Fig. **1A**), exhibited extremely delayed or failed seed  
141 germination (McNellis *et al.*, 1994). To determine whether *fusca* phenotypes were in general  
142 associated to seed germination defects we tested the germination of another *fusca* mutant,  
143 *cop10-1*. *COP10* belongs to the CDDD complex that conforms an E3 ligase (Lau and Deng  
144 2012). The purple-colored seeds of the *cop10-1* seedling-lethal mutant (Fig. **1B**) (Wei *et al.*,  
145 1994) germinated normally, like wild-type seeds, under normal conditions (mock), indicating  
146 that the *fusca* phenotypes are not intrinsically associated with germination defects (Fig. **1C**).  
147 In the presence of 10  $\mu$ M gibberellic acid ( $GA_3$ ), the germination rate of *cop1-5* seeds was  
148 greatly enhanced compared to that of mock-treated seeds (Fig. **1D**).

149 To further confirm the regulatory role of *COP1* in seed germination, we generated  
150 *COP1-OX/cop1-4* transgenic plants by transforming *cop1-4* (*cop1* weak allele) mutant plants  
151 (McNellis *et al.*, 1994) with a *35S::COP1-GFP* construct (see Methods; Fig. **S1**). Next, we  
152 examined the germination rates of *cop1-4* and *COP1-OX/cop1-4* seeds in the presence of  
153 *GA* or the *GA* biosynthesis inhibitor paclobutrazol (*PAC*) (Fig. **2**). We found that the  
154 germination of *cop1-4* seeds was slightly, but significantly, delayed compared to that of wild-  
155 type seeds under normal conditions (mock treatment) but was fully restored in the presence  
156 of *GA*, (Fig. **2A,B**). Moreover, compared to wild-type seeds, the faster germination rate of  
157 *COP1-OX/cop1-4* seeds at 1.5 d after incubation (DAI) at 22°C in long day conditions (Fig.  
158 **2B**) indicated not only the full rescue of the *cop1-4* defect in delayed germination but also a  
159 positive effect of *COP1* on seed germination. However, in the presence of *PAC* at 3 DAI  
160 (Fig. **2B,C**), the germination of *cop1-4* mutant seeds was impaired, whereas *COP1-*  
161 *OX/cop1-4* seeds germinated much faster and in higher percentage than wild-type seeds,  
162 showing strong insensitivity to the negative effect of *PAC* on seed germination. Thus,  
163 *COP1*'s effect on seed germination is stronger when *GA* levels are reduced. These results  
164 suggest that *COP1* positively regulates seed germination, either by targeting a component of  
165 the *GA* signaling pathway involved in germination or by affecting a *GA*-independent pathway  
166 concurrently implicated in seed germination.

167

### 168 *COP1* upregulates the expression of germination-associated genes in imbibed seeds

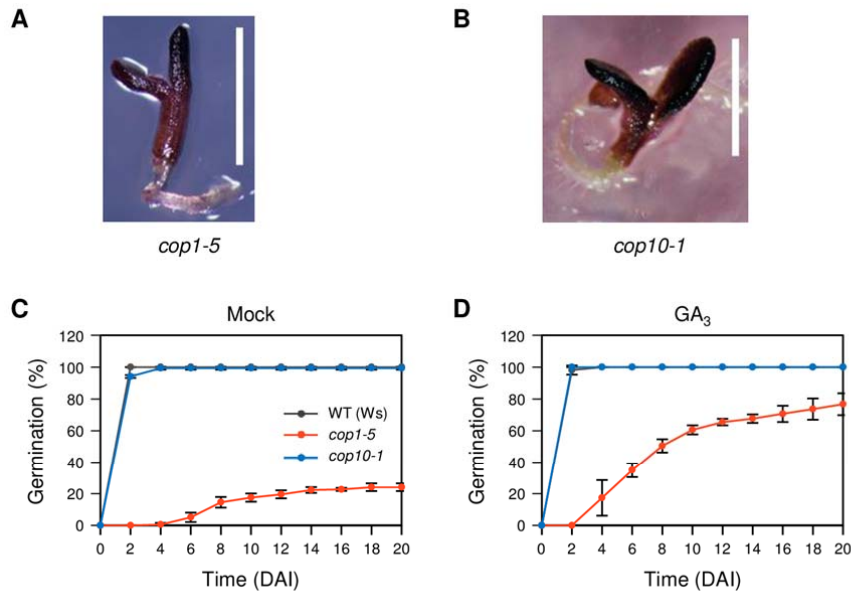

**Figure 1.** Germination rate of *cop1-5* seeds is dramatically enhanced in the presence of GA. (A, B) The seedling-lethal phenotypes of *cop1-5* (8 DAI) (A) and *cop10-1* (4 DAI) (B) mutants. (C, D) Germination rates of wild-type (WT; Ws ecotype), *cop1-5*, and *cop10-1* seeds on MS medium (mock) (C) or on the same medium containing 10  $\mu$ M GA<sub>3</sub> (D). Germination rates were determined by counting the seeds with protruding radicles over 20 days. The mean and SD were obtained from three biological repeats (~100 seeds/repeat). The experiments were repeated five times with similar results. DAI, day(s) after incubation to 22°C under long days; GA, gibberellin.

169 During seed imbibition, GA upregulates the expression of downstream genes that induce cell  
170 wall remodeling needed for germination, expansins (EXPA) and xyloglucan  
171 endotransglucosylases/endohydrolases (XTHs) (Weitbrecht *et al.*, 2011; Shi *et al.*, 2013). To  
172 examine the positive role of COP1 in seed germination at the transcriptional level, we  
173 analyzed the expression levels of four cell wall remodeling genes by qRT-PCR in *cop1-4* and  
174 *COP1-OX/cop1-4* seeds, as compared to wild-type seeds, at 3 DAI under normal conditions  
175 and in the presence of PAC (Fig. 3). We found that expression of *EXPA1*, *EXPA2*, and  
176 *XTH33* was downregulated in the *cop1-4* seeds and only *XTH33* was upregulated in *COP1-*  
177 *OX/cop1-4* seeds under normal conditions. In the presence of PAC, the expression of  
178 *EXPA1*, *EXPA2*, *EXPA8* and *XTH33* was downregulated in *cop1-4* seeds and upregulated in  
179 *COP1-OX/cop1-4* seeds. Therefore, our results show that COP1 positively regulates the  
180 expression of genes involved in cell wall remodeling and that this regulatory role is  
181 evidenced upon inhibition of GA biosynthesis by PAC treatment, in accordance with the  
182 germination phenotypes observed in Fig. 1.

183



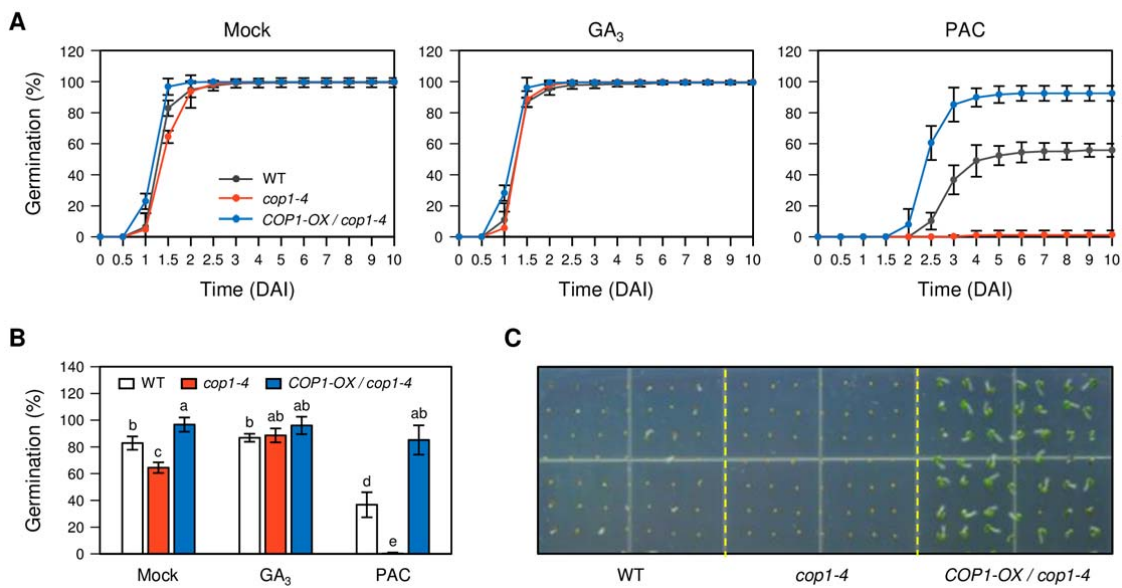

**Figure 2.** COP1 acts as a positive regulator in seed germination.

(A) Germination rates of WT (Col-0 ecotype), *cop1-4*, and *COP1-OX/cop1-4* seeds on MS phytoagar medium (mock) or on the same medium containing 10  $\mu$ M GA<sub>3</sub> or 10  $\mu$ M PAC from 0 to 10 DAI. (B) Germination scored at 1.5 DAI of the same lines and treatments as in (A). Germination rates were determined by counting the seeds with protruding radicles. The mean and SD were obtained from three independent repeats (~100 seeds/repeat). Different letters indicate significantly different values according to a one-way ANOVA and Duncan's least significant range test ( $P < 0.05$ ). (C) Germination phenotypes of WT, *cop1-4*, and *COP1-OX/cop1-4* seeds on MS medium containing 10  $\mu$ M PAC at 3 DAI. The experiments were repeated five times with similar results. DAI, day(s) after incubation to 22°C under LD; GA, gibberellin; PAC, paclobutrazol.

**184 Light signaling regulators PIF1 and HY5 destabilized by COP1 do not explain the PAC**  
**185 hypersensitivity of *cop1* mutant seeds.**

**186** Previous studies have shown that COP1 mediates PIF1 destabilization upon dark-to-light  
**187** transition to allow the establishment of the photomorphogenic developmental program (Zhu  
**188** *et al.* 2015). PIF1 also acts as a negative regulator of seed germination by promoting the  
**189** expression of *DELLA*, *DOF AFFECTING GERMINATION 1 (DAG1)*, and *SOM* (Oh *et al.*,  
**190** 2007; Oh *et al.*, 2009; Kim *et al.*, 2008; Gabriele *et al.*, 2010; Seo *et al.*, 2009). However, a  
**191** relation between COP1 and PIF1 in seed germination was never found. In addition, HY5, a  
**192** positive regulator of photomorphogenesis that is destabilized by COP1 in darkness  
**193** (Osterlund *et al.*, 2000), is also involved in the ABA signaling pathway, where it negatively  
**194** regulates seed germination (Chen *et al.*, 2008; Yang *et al.*, 2018). Because these studies do  
**195** not discard a role of HY5 in GA-mediated seed germination, it could be speculated that HY5  
**196** destabilization by COP1 may be a mechanism to promote seed germination. To examine  
**197** whether *HY5* and *PIF1* play a role in GA-mediated seed germination, we analyzed the  
**198** germination rates of *pif1-1* and *hy5-215* single mutants and introgressed in a *cop1-4*



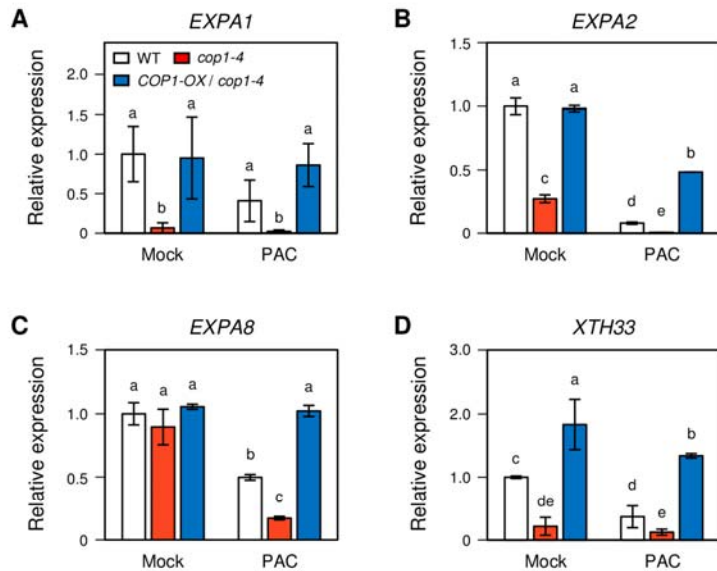

**Figure 3.** Expression profiles of germination-associated genes in *cop1-4* and *COP1-OX/cop1-4* seeds. (A-D) Expression levels of germination-associated genes, *EXPA1*, *EXPA2*, *EXPA8*, and *XTH33*, in *cop1-4* and *COP1-OX/cop1-4* seeds relative to those in WT seeds. After stratification, seeds were transferred to 22°C for germination and grown in MS phytoagar (mock) or in the presence of 10 μM PAC until 3 DAI, and analyzed by qRT-PCR. The expression level of each gene was normalized to that of *ACTIN2* (*ACT2*). Expression levels of each gene are shown relative to the expression of WT in the mock-treatment group, which is set as 1. The mean and SD were obtained from three biological repeats (~30 seeds/repeat). Different letters indicate significantly different values according to a one-way ANOVA and Duncan's least significant range test ( $P < 0.05$ ). The experiments were repeated three times with similar results. DAI, day(s) after incubation to 22°C under LD; PAC, paclobutrazol.

199 background under normal conditions and in the presence of PAC (Fig. **S2** and **S3**). Seeds of  
 200 *pif1-1* and *pif1-1 cop1-4* mutants, when exposed to light, behaved similarly to wild-type and  
 201 *cop1-4* seeds respectively, in mock and under PAC treatment, suggesting that *PIF1* is not  
 202 involved in GA-mediated seed germination neither acts in the same pathway than *COP1*  
 203 (Fig. **S2**). The analysis of *hy5-215* and *cop1-4 hy5-215* germination shows that *hy5*  
 204 germinates slightly early in PAC regarding the WT and the same is true for *cop1-4 hy5-215*  
 205 regarding *cop1-4* background, showing that in PAC *hy5* mutation contributes to a slight  
 206 partial suppression of the *cop1-4* germination defects (Fig. **S3**). Altogether, these results  
 207 suggested that neither PIF1 nor HY5 can be responsible for the strong *cop1-4* germination  
 208 defects observed in the presence of PAC.

209

210 **RGL2, a negative regulator of GA-mediated seed germination, is epistatic to COP1**

211 DELLA proteins are major negative regulators in the GA signaling pathway that comprise

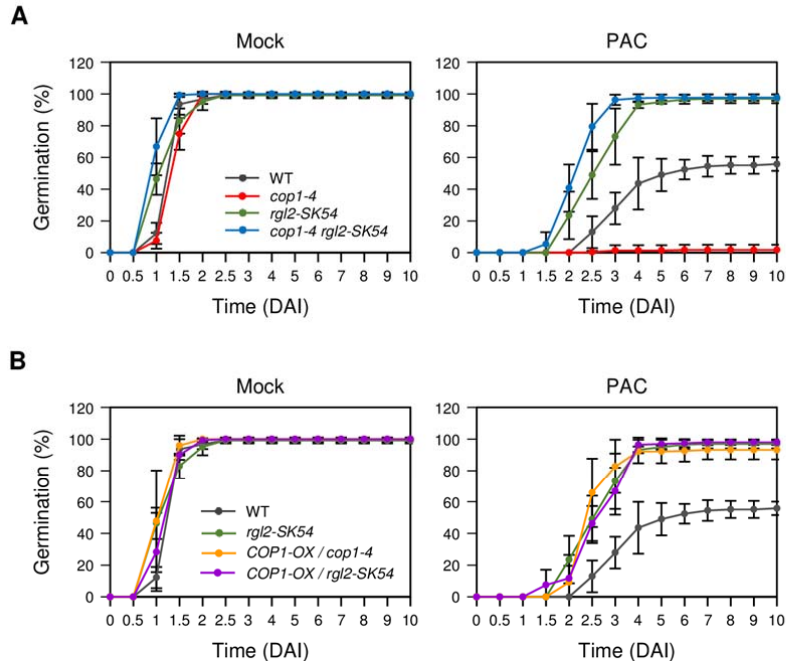

**Figure 4.** COP1 acts as an upstream regulator of RGL2 in seed germination.

(A) Germination rates of WT (Col-0), *cop1-4*, *rgl2-SK54*, and *cop1-4 rgl2-SK54* seeds on MS phytoagar medium (mock). (B) Germination rates of WT (Col-0), *rgl2-SK54*, *COP1-OX/cop1-4*, and *COP1-OX/rgl2-SK54* seeds in MS phytoagar medium containing 10  $\mu$ M PAC. After 3 days of stratification, the seeds were transferred to 22°C and the germination rate was determined by counting the seeds with protruding radicles at the indicated time from 0 to 10 DAI. The mean and SD were obtained from three biological repeats (~100 seeds/repeat). The experiments were repeated three times with similar results. DAI, day(s) after incubation to 22°C under LD; PAC, paclobutrazol.

212 five proteins, encoded by *GAI*, *RGA*, *RGA-LIKE1* (*RGL1*), *RGL2*, and *RGL3* (Sun, 2010). All  
213 five DELLA proteins are stabilized by PAC as it represses GA biosynthesis. Among them,  
214 *RGL2* is a key regulator of GA-mediated seed germination (Lee *et al.*, 2002). When we  
215 examined germination rates of mutants of these five genes, only the *rgl2-SK54* mutant  
216 showed a PAC-insensitive phenotype, as previously reported (Fig. S4) (Lee *et al.*, 2002;  
217 Tyler *et al.*, 2004). To determine the genetic interaction between *COP1* and *RGL2* in seed  
218 germination, we generated *cop1-4 rgl2-SK54* double mutants. In addition, we obtained  
219 *COP1-OX/rgl2-SK54* transgenic plants by transforming *35S::COP1-GFP* into the *rgl2-SK54*  
220 mutant. Under normal conditions, *rgl2-SK54* single- and *cop1-4 rgl2-SK54* double-mutant  
221 seeds germinated faster than wild-type and *cop1-4* seeds (Fig. 4A, left). In the presence of  
222 PAC, however, *cop1-4 rgl2-SK54* seeds showed an almost PAC-insensitive phenotype,  
223 similar to that of *rgl2-SK54* seeds, indicating that the *rgl2* mutation suppresses the PAC-  
224 hypersensitive phenotype of *cop1-4* (Fig. 4A, right).

225 *COP1-OX/cop1-4* seeds germinated much faster and in higher percentage than wild-  
226 type seeds, and similarly to *rgl2-SK54* and *COP1-OX/rgl2-SK54* seeds, in the presence of

227 PAC, suggesting that RGL2 acts downstream of COP1 and could be a COP1 target (Fig. **4B**,  
228 **right**). Following up on the idea that an active COP1 should be then necessary to degrade  
229 RGL2 and promote seed germination, we measured the germination rates of the *cop1-4*  
230 lines overexpressing *COP1* variants that failed to dimerize or enter the nucleus, thus  
231 compromising COP1 E3 ligase function (Lee *et al.* 2017; Stacey *et al.*, 1999). COP1<sup>WT</sup>-GFP  
232 and COP1<sup>L105A</sup>-GFP fusions, which are able to form COP1 homodimers, fully complemented  
233 the *cop1-4* germination defects in the presence of PAC, whereas COP1<sup>L170A</sup>-GFP, whose  
234 ability to form dimers is severely impaired, and COP1<sup>cyt</sup>-GFP, which is retained in the  
235 cytoplasm, did not rescue the *cop1-4* germination defects (Fig. **S5**). Although we could not  
236 rule out the possibility that these effects might be due to collateral effects of *cop1* mutation,  
237 these results are consistent with the fact that COP1 dimerization is required for target  
238 degradation, suggesting that the role of COP1 in seed germination requires a fully active  
239 nuclear E3 ubiquitin ligase activity.

240

#### 241 **COP1 interacts with and destabilizes RGL2**

242 We then investigated whether COP1 regulates RGL2 indirectly at the transcriptional level or  
243 directly at the post-translational level. For this, we analyzed the expression levels of *RGL2*  
244 and *COP1* by qRT-PCR in *cop1-4* and *rgl2-SK54* seeds at 3 DAI, respectively, and  
245 compared them to those in wild-type seeds. We found that the expression levels of *RGL2* in  
246 *cop1-4* and those of *COP1* in *rgl2-SK54* did not differ significantly from those of the wild-type  
247 (Fig. **S6A,B**). These results indicated that COP1 does not regulate *RGL2* at the  
248 transcriptional level.

249 Next, to examine whether COP1 interacts with and destabilizes RGL2 post-  
250 translationally, we first tested the physical interaction between the two proteins. Y2H assays  
251 revealed that, whereas full-length COP1 did not interact with RGL2, a truncated version of  
252 COP1 containing the RING domain could directly interact with RGL2 (Fig. **5A**). Since all  
253 COP1 fragments and RGL2 are being expressed in yeast (Fig. **S7**), it seems that the full-  
254 length COP1 is less efficient in promoting a direct interaction than the COP1 RING domain  
255 alone in the yeast cells. To overcome this technical limitation, we performed *in vitro* pull-  
256 down assays with recombinant proteins expressed in *E. coli* (Fig. **5B**). *In vitro* purified MBP-  
257 COP1 could pull-down GST-RGL2 fusions, thus supporting a direct interaction between the  
258 full-length COP1 and RGL2. To further confirm this interaction we performed semi-*in vivo*  
259 pull-down assays in the opposite direction. In this experiment, MBP-RGL2 could pull-down  
260 COP1-GFP from Arabidopsis seedling extracts whereas MBP protein alone could not (Fig.  
261 **5C**).

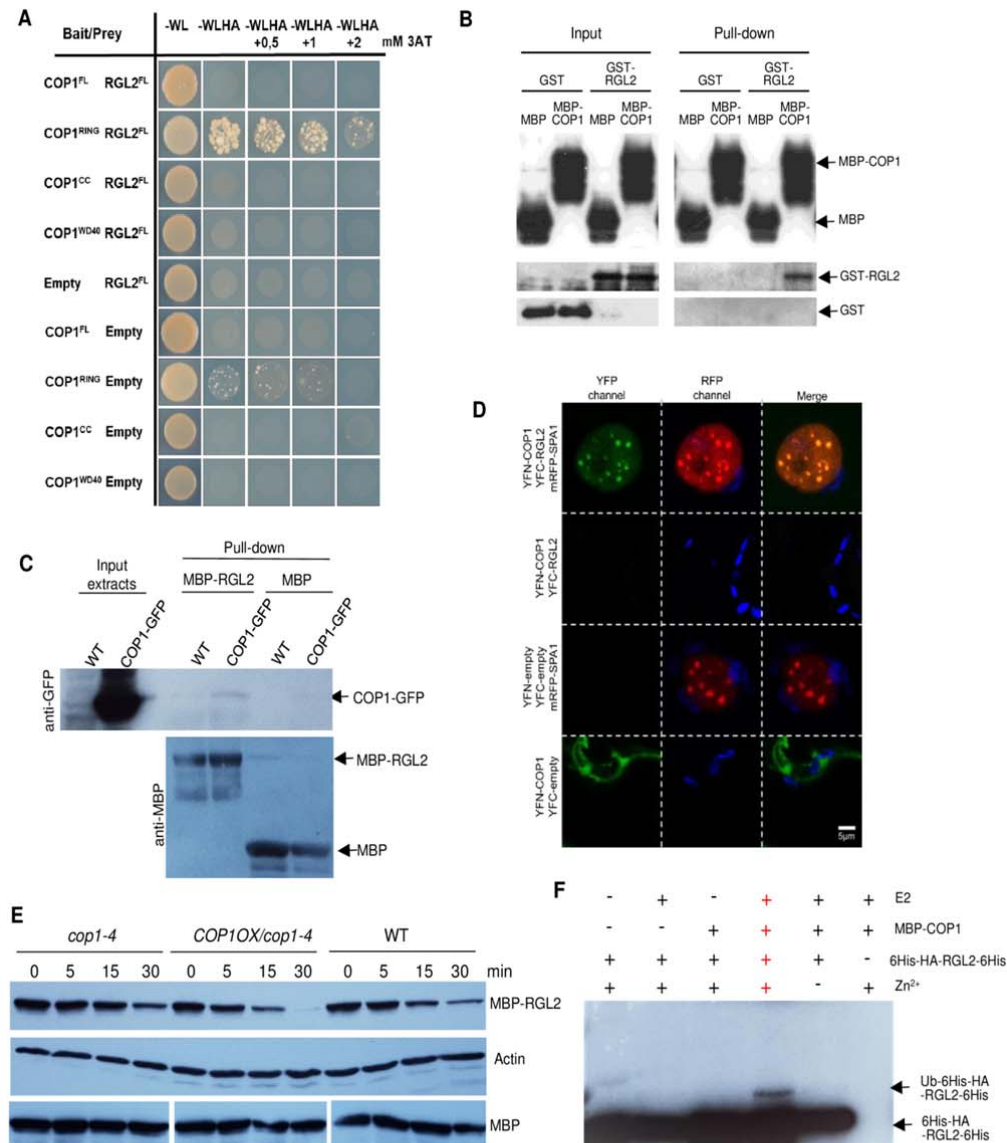



263 fluorescent complementation (BiFC) assays in *N. benthamiana* leaves. Contrary to the *in*  
264 *vitro* results, the co-expression of truncated YFN-COP1 and truncated YFC-RGL2 constructs  
265 showed no YFP (Yellow Fluorescent Protein) reconstitution signal. Based on the recent  
266 results by Blanco-Touriñan et al., (2020) where the addition of SPA1 was necessary to  
267 visualize the interaction between COP1 and the DELLA proteins RGA and GAI, we tested  
268 the effect of mRFP-SPA1 addition to COP1-RGL2 BiFC assays. Co-expression with SPA1  
269 fusion rendered a very strong YFP-reconstitution signal visible in nuclear speckles,  
270 suggesting that SPA1 protein is necessary for the *in vivo* efficient recognition of RGL2 by  
271 COP1 (Fig. 5D).

272 To examine whether COP1 destabilizes RGL2 *in vivo*, we examined the changes in  
273 RGL2 levels in the *cop1-4* and *COP1-OX/cop1-4* backgrounds using cell-free (or *in vitro*)  
274 degradation assays. To this end, we incubated MBP-RGL2 protein fusions with the total  
275 soluble protein extracts of wild-type, *cop1-4*, and *COP1-OX/cop1-4* grown in the dark and  
276 detected the changes in MBP-RGL2 levels over 30 min by immunoblot analysis using an  
277 anti-MBP antibody. MBP-RGL2 was degraded faster in *COP1-OX/cop1-4* extracts and  
278 slowly in *cop1-4* extracts than in wild-type whereas MBP alone remained stable (Fig. 5E).  
279 Furthermore, *in vitro* ubiquitination assays showed that RGL2 (6His-HA-RGL2-6His fusion)  
280 was directly ubiquitinated by MBP-COP1 (Fig. 5F). These results indicate that COP1 directly  
281 interacts with and ubiquitinates RGL2 to induce its destabilization and suggest a molecular  
282 mechanism by which COP1 regulates RGL2 levels to induce seed germination.

283

#### 284 **COP1 is as a positive regulator of germination-promoting genes that act downstream** 285 **of RGL2**

286 To inhibit germination, RGL2 represses the expression of *GASA6*, *EXPA* and *XTH* genes  
287 which promote seed germination (Zhong et al., 2015; Stamm et al., 2012; Rombolá-  
288 Caldentey et al., 2014; Yan et al., 2014). To further support a regulatory link between COP1  
289 and RGL2, we investigated the effect of COP1 function on the expression of five  
290 germination-associated genes regulated by RGL2, including *GASA6*, *EXPA1*, *EXPA2*,  
291 *EXPA8*, and *XTH33* (Fig. 6). In mock- and PAC-treatment conditions, these germination-  
292 associated genes were downregulated in *cop1-4* seeds and upregulated in *rgl2-SK54* seeds.  
293 In *cop1-4 rgl2-SK54* seeds, the expression levels of the germination-associated genes were  
294 quite similar to those in *rgl2-SK54* seeds, demonstrating that the negative effect of *cop1-4*  
295 mutation on their expression was cancelled out by the *rgl2* mutation. These results show that  
296 COP1, through RGL2 destabilization, positively regulates the expression of *GASA6* and  
297 *EXPA1*, as well as other genes related to cell wall remodeling that are involved in seed

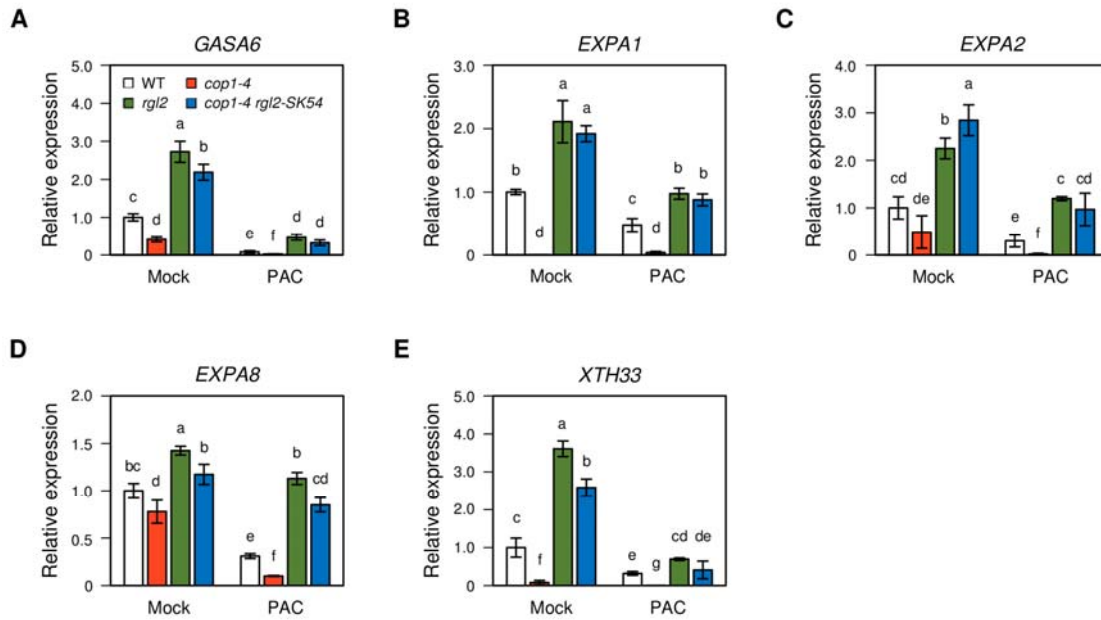

**Figure 6.** Effects of PAC on the expression of germination-associated genes in imbibed *cop1-4*, *rgl2-SK54*, and *cop1-4 rgl2-SK54* seeds.

Altered expression of five *RGL2*-downregulated germination-associated genes, *GASA6*, *EXPA1*, *EXPA2*, *EXPA8*, and *XTH33*, in imbibed WT (Col-0), *cop1-4*, *rgl2*, and *cop1-4 rgl2-SK54* seeds in the presence or absence of 10  $\mu$ M PAC at 3 DAI. The expression level of each gene obtained by qRT-PCR was normalized to that of *ACTIN2* (*ACT2*) and represented relatively to the expression levels in WT under normal conditions (mock), which is set as 1. The mean and SD were obtained from three biological samples (~30 seeds/repeat). Different letters indicate significantly different values according to a one-way ANOVA and Duncan's least significant range test ( $P < 0.05$ ). DAI, day(s) after incubation to 22°C under LD; PAC, paclobutrazol.

298 germination.

299

### 300 GA increases COP1 stability in the imbibed seeds

301 In imbibed seeds, increased GA biosynthesis is one of the most important triggers for the  
 302 induction of seed germination (Steber *et al.*, 1998). The increase in endogenous GA  
 303 concentration decreases the stability of RGL2 (Tyler *et al.*, 2004). Thus, we wondered  
 304 whether GA or PAC have an impact on COP1 accumulation in imbibed seeds that could lead  
 305 to changes in RGL2 stability. To examine the effects of GA and PAC on COP1  
 306 accumulation, we measured both *COP1* mRNA and *COP1* protein levels in germinating  
 307 seeds and during the onset of post-germinative seedling establishment after treatments with  
 308 GA or PAC for 48 h (Fig. 7A–C). The results showed that *COP1* protein levels were  
 309 increased by GA treatment 12 hours after imbibition and slightly decreased by PAC  
 310 treatment (Fig. 7A–C). The differences in *COP1* protein accumulation in response to GA and



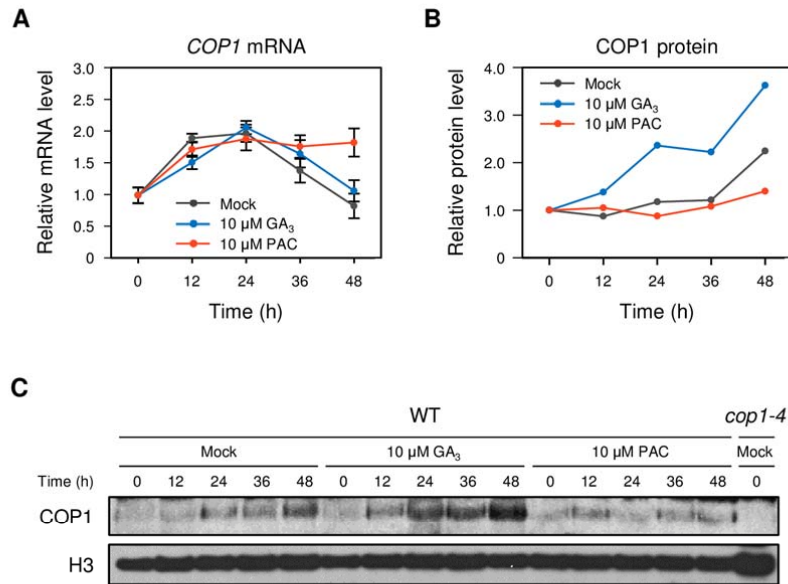

**Figure 7.** COP1 stability is enhanced by GA and decreased by PAC.

(A) Relative expression levels of *COP1* in seeds stratified for 3 days at 4°C on MS medium and then transferred to 22°C. Seeds were sampled at the indicated time points after transfer. Relative expression levels of *COP1* were normalized to those of *ACTIN2* (*ACT2*). The expression levels of *COP1* are shown relative to the expression at time 0 under mock treatment, which is set as 1. In qRT-PCR analysis, the mean and SD were obtained from three biological repeats (~30 seeds/repeat). (B, C) COP1 stability is increased by GA treatment but decreased by PAC treatment. COP1 and H3 histone protein levels were detected by immunoblot analysis and relative band intensity measured by ImageJ. Protein levels of each COP1 band were normalized to the level of H3 in each lane. The protein levels for each COP1 are shown relative to the expression at time 0 under mock treatment, which is set as 1. The mean and SD were obtained from three biological repeats (~100 seeds/repeat). GA, gibberellin; PAC, paclobutrazol.

311 PAC did not correlate with the variation pattern of *COP1* mRNA expression under these  
 312 conditions, indicating that GA and PAC have post-translational effects on COP1 abundance  
 313 (Fig. 7A–C). These results suggest that increased GA levels upon seed imbibition promote a  
 314 sustained accumulation of COP1 at the onset of the seedling establishment process. These  
 315 results suggest that by regulating COP1 levels, GA promotes RGL2 degradation allowing  
 316 seeds to germinate and contributing to attain adequate COP1 levels, required for seedling  
 317 establishment and further development under light/dark cycles.

318

319

## 320 Discussion

321 Seeds are equipped with molecular sensors to monitor surrounding environmental conditions  
322 and determine whether they are favorable for plant establishment (Seo *et al.*, 2009). Here  
323 we describe a new regulatory module in which COP1 positively regulates seed germination  
324 by interfering with a component of the GA signaling pathway, the DELLA family member  
325 RGL2, which is a well-known repressor of seed germination. We showed that *cop1-4*  
326 mutants are strongly sensitive to PAC, while *COP1-OX/cop1-4* seeds are strongly insensitive  
327 to this GA biosynthesis inhibitor (Fig. 2), mimicking the phenotype of the *rgl2-SK54* mutant  
328 (Fig. 4, Fig. S4). In addition, COP1 promotes the degradation of RGL2 (Fig. 5). Supporting  
329 these findings, genetic analysis showed that *rgl2* is epistatic to *cop1*, as the double mutants  
330 show complete suppression of the *cop1-4* PAC hypersensitivity (Fig. 4A) and of its defects  
331 on the activation of genes encoding cell wall proteins involved in cell loosening during  
332 germination (Fig. 6). Furthermore, GA enhances COP1 protein accumulation upon imbibition  
333 (Fig. 7), evidencing the GA's broad role as a primary regulator in seed germination.

334

### 335 COP1 regulates seed germination through RGL2

336 The CUL4<sup>COP1-SPA</sup> E3 ubiquitin ligase is well described as a repressor of light signaling,  
337 targeting for degradation photomorphogenesis-promoting factors (Lau & Deng, 2012; Zhu *et al.*,  
338 *et al.*, 2015). Our data show that *cop1* alleles display defects in seed germination that are  
339 unrelated to the fusca phenotypes as *cop10* fusca mutants do not display them. COP10 and  
340 DET1 belong to the same E3 ubiquitin ligase and it has been previously found that *det1*  
341 fusca mutant seeds germinate better than WT in normal conditions and are hypersensitive to  
342 ABA (Fernando and Schroeder, 2015). In the case of *cop1* mutant seeds, the defects can  
343 partially complemented by GA application and, likewise, can be exacerbated by the  
344 presence of PAC, suggesting that COP1 plays a role in seed germination by interacting with  
345 the GA signaling pathway (Fig. 1). CUL4<sup>COP1-SPA1</sup> complexes play a positive role in seed  
346 germination by promoting the rapid degradation of PIF1 under red and far-red light  
347 conditions (Zhu *et al.*, 2015). Thus, by being degraded by COP1, PIF1 acts in light-mediated  
348 seed germination independently of GA, making unlikely that the COP1–PIF1 module could  
349 be responsible for GA-related germination defects. In addition, HY5, a well-described COP1  
350 target in photomorphogenesis, is known to repress seed germination by activating *ABI5*  
351 gene expression in response to ABA and salt stress (Chen *et al.*, 2008; Yu *et al.*, 2016).  
352 Thus, HY5 role in seed germination seems to be unrelated with GA signaling. This is  
353 consistent with our observation that *pif1* and *hy5* seeds germinate similarly to wild-type

354 seeds in the presence of PAC. Together with the fact that *pif1* has a null and *hy5* only a little  
355 suppressive effect on the *cop1* germination hypersensitivity to PAC, both transcription  
356 factors are unlikely to be involved in the GA-related seed germination response.

357 The best-described mutants showing PAC insensitivity during germination are *rgl2*  
358 mutants. Indeed, this characteristic is a specific signature of *rgl2* among other *della* mutants  
359 (Lee *et al.*, 2002; Tyler *et al.*, 2004; Cao *et al.*, 2005) (Fig. **S4**). Moreover, among the five  
360 Arabidopsis DELLA proteins, RGL2 has been described as a primary player in seed  
361 germination. Upon GA perception by the GID1 receptor, GID-GA-DELLA complexes are  
362 degraded by SCF<sup>S<sub>LY1</sub></sup> in a GA-dependent manner, which is the canonical pathway for RGL2  
363 degradation (McGinnis *et al.*, 2003; Dill *et al.*, 2004). According to our experiments, the *rgl2*-  
364 *SK54* mutation completely suppresses the germination defects of *cop1-4* seeds (Fig. **4**),  
365 suggesting that RGL2 acts downstream of COP1 in seed germination and might be a direct  
366 target of COP1 ubiquitin ligase activity, which would represent a novel mechanism for the  
367 targeted degradation of RGL2.

368

### 369 **COP1 destabilizes RGL2**

370 We found that COP1 directly interacts with RGL2, in a mechanism involving SPA1, and  
371 mediates its ubiquitination to control RGL2 abundance (Fig. **5**). Thus, COP1-mediated  
372 degradation of RGL2 might occur in parallel with the canonical SLY1- and GA-dependent  
373 degradation. Blanco-Touriñan *et al.* (2020) recently reported that COP1-SPA1 complexes  
374 mediate the destabilization of two other DELLA proteins, GAI and RGA, to promote  
375 hypocotyl elongation in response to shade and temperature cues. These results are  
376 complementary to our findings, and suggest that the targeted degradation of DELLA proteins  
377 by COP1 goes far beyond germination and can be extended to other DELLA- and GA-  
378 regulated processes during plant development. A striking similarity between our results and  
379 those of Blanco-Touriñan *et al.* (2020) is that *in vivo*, COP1 requires the presence of SPA1  
380 for interaction with GAI and RGA, though not for their ubiquitination (Blanco-Touriñan *et al.*,  
381 2020). Moreover, we report that an active COP1 protein with full capacity to dimerize and  
382 enter the nucleus is essential to maintaining wild-type germination levels in the presence of  
383 PAC (Fig. **S5**).

384 The CSN complex allows the activation of cullin-based E3 ubiquitin ligases by  
385 maintaining proper cycles of neddylation (an ubiquitin-like modification) and deneddylation of  
386 cullins. Previous studies have shown that CSN mutants have poor germination and

387 hyperdormancy phenotypes (Wei & Deng, 2003; Dohmann *et al.*, 2010; Franciosini *et al.*,  
388 2015; Jin *et al.*, 2018). In the case of *csn1-10*, the hyperdormancy phenotype was totally  
389 dependent on the failure to degrade RGL2. This phenotypic defect might be due to altered  
390 neddylation states and activities of SCF<sup>SLY1/2</sup> E3 ubiquitin ligases (Jin *et al.*, 2018). However,  
391 it cannot be ruled out that *csn* mutations also impair the activity of CUL4<sup>COP1-SPA</sup> complexes  
392 towards RGL2. Indeed, it has been recently shown that CRL4<sup>CDDD</sup> complexes mediate COP1  
393 degradation in a process that requires functional CSN (Cañibano *et al.*, 2021). Supporting  
394 this notion, the deneddylation/neddylation ratios of CUL1, CUL3, and CUL4 have all been  
395 found to be higher after seed imbibition, suggestive of increased activity of CSN and various  
396 CULLIN-associated complexes during germination (Wei & Deng, 2003; Franciosini *et al.*,  
397 2015)

398 Our results uncovered a novel regulatory mechanism that restricts RGL2 function,  
399 suggesting that different mechanisms besides the canonical targeted degradation of RGL2  
400 by SCF<sup>SLY1/2</sup> act coordinately to govern seed germination. These mechanisms likely include  
401 GA-independent processes. In fact, the release from dormancy of *sly1* hyperdormant seeds  
402 is independent of the accumulation of the RGL2, GAI, and RGA DELLA proteins (McGinnis  
403 *et al.*, 2003; Dill *et al.*, 2004; Arizumi & Steber, 2007; Penfield *et al.*, 2006). Indeed, *sly1* loss-  
404 of-dormancy germination correlates better with endogenous levels of ABI5 and seems to  
405 depend on ABA biosynthesis (Piskurevich *et al.*, 2008). These results highlight the  
406 complexity of the mechanisms involved in seed germination and release from dormancy.

407

#### 408 **COP1 promotes the expression of cell wall modification genes and is induced by GA**

409 RGL2 repression of seed germination depends on a number of transcription factors that end  
410 up connecting RGL2 function to structural genes that mechanically affect cell wall  
411 composition and the control of germination (Stamm *et al.*, 2012; Rombolá-Caldentey *et al.*,  
412 2014; Yan *et al.*, 2014; Sánchez-Montesino *et al.*, 2019). For most target genes, their  
413 upstream regulatory mechanism is still unclear as is case for the *GASA6-EXP1A* regulatory  
414 module. *GASA6* promotes cell elongation at the embryonic axis through the action of *EXPA1*  
415 by an unknown mechanism (Zhong *et al.*, 2015). Since RGL2 represses *GASA6* and  
416 *EXPA1*. Thus, by repressing RGL2, COP1 can positively regulate the expression of these  
417 genes, supporting a role for COP1 in promoting embryonic axis cell elongation during seed  
418 germination (Figs. 6, 8). As shown by our analyses, COP1 promotes the expression of  
419 additional cell-wall-modifying genes that were previously reported to be targets of RGL2 in  
420 seed germination (Fig. 6; Stamm *et al.*, 2012).

421 Notably, GA promotes COP1 protein accumulation during of seed germination and at  
422 the onset of seedling establishment (Fig. 7). Though the mechanism behind this process  
423 requires further elucidation, it is clear that COP1 plays a major role in initial seedling  
424 development by promoting growth according to day/night cycles and circadian regulation  
425 contributing also for the ABA-mediated inhibition of post-germinative seedling establishment  
426 (Lau & Deng, 2012; Yadukrishnan *et al.*, 2020). In this way, increased accumulation of  
427 COP1 in response to GA might prevent precocious photomorphogenesis after seed  
428 germination and might afterward be necessary to maintain an equilibrium between the  
429 regulation of growth by elongation and photomorphogenic development in initial seedling  
430 developmental stages.

431

## 432 **Conclusions**

433 Together, our data uncover a key role for COP1 in seed germination through promotion  
434 of the degradation of RGL2, a GA-regulated master repressor of seed germination.  
435 Therefore, COP1 contributes to the GA signaling pathway to promote seed germination and  
436 cell elongation, and thus is essential for initial seedling establishment. Further physiological  
437 and genetic studies will be key to fully understanding the GA-COP1 relations and fully  
438 integrating COP1 into the intricate network of seed germination regulatory components.

439

## 440 **Materials and Methods**

### 441 **Plant materials and growth conditions**

442 The *Arabidopsis thaliana* mutants used were of Columbia (Col) ecotype except for the *cop1-5*  
443 (Deng *et al.*, 1992) and *cop10-1* (Wei *et al.*, 1994) [Wassilewskija (Ws) ecotype] mutants,  
444 which are seedling lethal and were maintained as heterozygotes. The single mutants (Col  
445 ecotype) were *cop1-4* (a weak mutant allele; McNellis *et al.*, 1994), *gai-t6* (Peng *et al.*,  
446 1997), *rga-28* (SALK\_089146), *rgl1-SK62* (SALK\_136162), *rgl2-SK54* (SALK\_027654), *rgl3-3*  
447 (CS16355), *hy5-215* (Osterlund *et al.*, 2000), and *pif1-1* (Oh *et al.*, 2006). The double  
448 mutants used were *cop1-4 hy5-215* (Maier *et al.*, 2013) and *pif1-1 cop1-4* (Xu *et al.*, 2014).  
449 The *cop1-4 rgl2-SK54* double mutants were generated by crossing the single mutants and  
450 F2 genotyping with dCAPS (*cop1-4*; *SpeI* restriction enzyme digestion) and PCR (*rgl2-SK54*)  
451 primers (Table S1). For the 35S:*COP1-GFP* (*COP1-OX*) constructs, the full-length  
452 *COP1* cDNA PCR amplified from Col-0 cDNA, cloned into the pDONR221 vector (Invitrogen)  
453 and subsequently into the pMDC85 plasmid (Curtis & Grossniklaus, 2003). Through

454 *Agrobacterium tumefaciens* (GV3101)-mediated transformation in *cop1-4* or *rgl2-SK54*  
455 mutants by the floral-dip method (Clough & Bent, 1998) *COP1-OX/cop1-4* or *COP1-OX/rgl2-*  
456 *SK54* transgenic plants were obtained. The *COP1* mutant variants, i.e. the *35S:COP1<sup>WT</sup>-*  
457 *GFP/cop1-4*, *35S:COP1<sup>L105A</sup>-GFP/cop1-4*, *35S:COP1<sup>L170A</sup>-GFP/cop1-4*, and *35S:COP1<sup>cyt</sup>-*  
458 *GFP/cop1-4* transgenic plants, were previously described (Lee *et al.*, 2017).

459

#### 460 **Germination rates**

461 Fresh seeds (harvested within one month before the experiments) were used to measure  
462 germination rates. Seeds were surface sterilized with a solution containing 70% ethanol and  
463 0.1% Triton X-100, for 20 min, and washed with 100% ethanol for three times. After being  
464 air-dried on sterile 3M filter paper, seeds were seeded on MS phytoagar medium (mock) or  
465 on the same medium supplemented with 10  $\mu$ M GA<sub>3</sub> or 10  $\mu$ M PAC. For stratification, seeds  
466 were kept at 4°C in darkness for 72 h. Germination experiments were initiated with the  
467 transferred to a growth chamber at a constant 22°C temperature under cool white  
468 fluorescent light (100  $\mu$ mol m<sup>-2</sup> s<sup>-1</sup>) and long days (LD; 16-h light/day) and referred as days  
469 after incubation (DAI). To measure germination rates, germinated seeds were scored upon  
470 radicle emergence. For each experiment, three to five biological replicates of pools of about  
471 100 seeds were used. Among each replicate seeds were collected from plants grown  
472 simultaneously under same conditions.

473

#### 474 **Yeast two-hybrid (Y2H) assays**

475 Y2H assays were performed using the Matchmaker GAL4 two-hybrid system (Clontech).  
476 The full-length and/or partial (RING; aa 1–104, CC; aa 121–213, WD-40 repeat; aa 371–  
477 675) cDNAs of *COP1* were obtained by RT-PCR from wild-type (Col) plants (Yu *et al.*, 2008)  
478 and cloned into the pGBK vector (as baits), and the full-length *RGL2* cDNA was cloned into  
479 the pGAD vector (as prey). Yeast (strain AH109) cotransformation was performed according  
480 to the Yeast Handbook (Clontech). An anti-HA (Roche) and an anti-myc (kindly provided by  
481 Xing Wang Deng) antibodies were used to check the expression of AD and BD fusion  
482 proteins.

#### 483 **Bimolecular fluorescence complementation (BiFC) assays**

484 The full-length cDNA of *RGL2* was gateway recombined to generate a YFC fusion into the  
485 BiFC plasmid sets (Belda-Palazón *et al.*, 2012). The YFN-COP1 and mRFP-SPA1  
486 constructs were kindly provided by David Alabadi (Blanco-Touriñan *et al.*, 2020). All the



487 clones were transformed into *Agrobacterium tumefaciens* (GV301). Clones expressing  
488 fusion proteins as indicated were co-infiltrated into the abaxial leaf surface of 3-week-old *N.*  
489 *benthamiana* plants as described (Voinnet et al., 2003). The leaves were infiltrated with 50  
490  $\mu$ M MG132 the day previous to the observation. The p19 protein was used to suppress gene  
491 silencing. The empty vectors were used as negative controls. Fluorescence was visualized  
492 in epidermal cells of leaves after 3 d of infiltration using a TCS SP8 Leica Microsystems  
493 confocal laser microscope.

494

#### 495 **Pull-down assays**

496 For semi-*in vivo* pull-down assays, the full-length RGL2 coding sequence was cloned into  
497 the pKM596 (a gift from David Waugh, Addgene plasmid # 8837) and the MBP recombinant  
498 protein fusions were expressed in the *E. coli* BL21 (DE3). Recombinant proteins were  
499 purified and pull-down assays were performed according to Fonseca and Solano (2013).  
500 MBP-tagged protein fusions were purified using amylose agarose beads. Equal amounts of  
501 seedling protein extracts were combined with 10  $\mu$ g MBP-tagged protein fusion or MBP  
502 protein alone, bound to amylose resin for 1 hr at 4°C with rotation, washed three times with 1  
503 ml of extraction buffer, eluted and denatured in sample buffer before immunoblot analysis.

504 For *in vitro* pull-down assays, the full-length coding sequence of *RGL2* was cloned into the  
505 pGEX-4T-1 vector (Pharmacia) to generate a GST-RGL2 fusion protein, and transformed in  
506 the BL21-CodonPlus (Stratagene) *E. coli* strain. GST and GST-RGL2 were induced by  
507 IPTG, and purified using glutathione Sepharose resin beads (ELPIS Biotech, Korea)  
508 according to the manufacturer's instruction. MBP and MBP-COP1 fusion protein were  
509 induced in BL21-CodonPlus (Stratagene) *E. coli* strain (Saijo *et al.*, 2003) and purified using  
510 amylose resin beads (ELPIS Biotech, Korea). For *in vitro* pull-down assays, 2  $\mu$ g of GST and  
511 GST-RGL2 proteins were incubated with immobilized MBP and MBP-COP1 proteins in  
512 binding buffer (50 mM Tris-HCl pH 8.0, 150 mM NaCl, and 1 mM EDTA) and incubated at  
513 4°C for 2 h. After being washed three times with the binding buffer, the protein-retained  
514 beads were boiled in Laemmli buffer and immunoblotted using anti-GST and anti-MBP  
515 antibodies (Santa Cruz Biotechnology, USA).

516

#### 517 **Immunoblotting on seed extracts**

518 To detect endogenous COP1 protein levels, an anti-COP1 polyclonal antibody was used  
519 (Lee *et al.*, 2017). Fresh seeds (harvested within 1 month before use) were imbibed in  
520 distilled water with or without 10  $\mu$ M GA<sub>3</sub> or 10  $\mu$ M PAC, and harvested at each time point.

521 Total crude extracts were prepared using extraction buffer (50 mM Tris-HCl pH 7.5, 4 M  
522 urea, 150 mM NaCl, 1 mM EDTA, and protease and phosphatase inhibitor mixtures (1 mM  
523 PMSF, 5 µg/mL leupeptin, 5 µg/mL aprotinin, 5 µg/mL pepstatin, 5 µg/mL antipain, 5 µg/mL  
524 chymostatin, 2 mM Na<sub>2</sub>VO<sub>3</sub>, 2 mM NaF and 50 µM MG132), separated by SDS-PAGE, and  
525 then immunoblotted with anti-COP1, anti-Myc (Santa Cruz Biotechnology, USA), and anti-  
526 GFP (Santa Cruz Biotechnology, USA) antibodies.

527

### 528 **Cell-free degradation assays**

529 MBP-tagged RGL2 proteins were prepared from BL21-CodonPlus *E. coli* cells (Stratagene)  
530 and purified using an amylose resin according to the manufacturer's instructions. For each  
531 reaction, 100 ng MBP-RGL2 or MBP proteins was incubated with 100 µg total soluble  
532 protein extract at 22°C in assay buffer [50 mM Tris-HCl (pH7.5), 100 mM NaCl, 10 mM  
533 MgCl<sub>2</sub>, 5 mM DTT, and 5 mM ATP] from the wild-type (Col-0), *cop1-4*, and *COP1-OX/cop1-4*  
534 seedlings, previously grown at 22°C in the dark for 6 days. The reaction was stopped by  
535 adding Laemmli buffer at the respective times.

536

### 537 **Reverse transcription and quantitative real-time PCR (qRT-PCR)**

538 Total RNA was extracted from seeds using the Fruit-mate (Takara, Japan) and MG RNAzol  
539 (Macrogen, South Korea) reagents according to the manufacturer's instructions. First-strand  
540 cDNA was synthesized from 2 µg total RNA using M-MLV reverse transcriptase with oligo-  
541 dT primer (Promega). Expression levels of germination-associated genes were measured by  
542 qRT-PCR analysis using LightCycler 480 SYBR Green I Master mix (Roche) in a LightCycler  
543 480 Real-Time PCR System (Roche, Basal, Switzerland). Expression levels were  
544 normalized by *ACTIN2* (*ACT2*). The gene-specific primer sets are shown in Table S1.

545

### 546 ***In vitro* ubiquitination assays**

547 Assays were performed as previously reported (Yu *et al.*, 2008) with minor modifications.  
548 Ubiquitination reaction mixtures contained 50 ng yeast E1 (Boston Biochem), 50 ng rice  
549 6xHis-Rad6 (E2), 10 µg unlabeled ubiquitin (Boston Biochem), and 2 µg MBP-COP1  
550 (previously incubated with 20 µM ZnCl<sub>2</sub>) in 30 µL of reaction buffer (50 mM Tris pH 7.5, 5  
551 mM MgCl<sub>2</sub>, 2 mM ATP, and 0.5 mM DTT). As a substrate, 50 ng 6xHis-HA-RGL2-6His  
552 fusion was used per reaction. After 2 h incubation at 30°C, reactions were stopped by  
553 adding 30 µL of Laemmli buffer, and then half of each mixture (30 µL) was boiled for 5 min

554 and separated by 7.5% SDS-PAGE. 6xHis-HA-RGL2-6His and its ubiquitinated conjugates  
555 were detected using anti-HA (1:1000; Roche) antibody.

556

557 **Accession numbers**

558 *COP1*, At2g32950; *COP10*, At3g13550; *ACT2*, At3g18780; *GASA6*, At1g74670; *EXPA1*,  
559 At1g69530; *EXPA2*, At5g05290; *EXPA8*, At2g40610; *GAI*, At1g14920; *RGA*, At2g01570;  
560 *RGL1*, At1g66350; *RGL2*, At3g03450; *RGL3*, At5g17490; *XTH33*, At1g10550.

561

562 **Acknowledgements** We thank Xing-Wang Deng and Giltsu Choi for the *cop1-4*, *cop1-5*,  
563 *cop10-1*, *hy5-205*, *pif1-1*, *gai-t6*, *rga-28*, *rgl1-SK62*, *rgl2-SK54*, and *rgl3-3* mutant seeds and  
564 to Enamul Huq, Utte Hoecker and Giltsu Choi for the *pif1-1 cop1-4* and *cop1-4 hy5-215*  
565 mutant seeds, respectively. We thank to David Alabadi for providing the mRFP-SPA1 and  
566 YFN-COP1 clones used in BiFC assays. We are grateful to Yolanda Fernandez for technical  
567 assistance.

568

569 **Supplemental Data**

570 **Supplementary Figure 1.** 35S:*COP1-GFP* (*COP1-OX*) complements *cop1-4*.

571 **Supplementary Figure 2.** Epistasis analysis of *PIF1* and *COP1* in GA dependent seed  
572 germination.

573 **Supplementary Figure 3.** Epistasis analysis of *HY5* and *COP1* in GA dependent seed  
574 germination

575 **Supplementary Figure 4.** PAC-insensitive phenotype in *rgl2-SK54* mutant seeds.

576 **Supplementary Figure 5.** *COP1* dimerization and nuclear localization are essential for  
577 PAC-insensitive germination in *COP1-OX/cop1-4* plants.

578 **Supplementary Figure 6.** Expression of *RGL2* and *COP1* in *cop1-4* and *rgl2-SK54* mutants,  
579 respectively.

580 **Supplementary Figure 7.** Expression of AD and BD protein fusions in Y2H experiments  
581 shown in Fig. 5A.

582 **Supplementary Table 1.** Primers used in this study.

583

584

## 585 **Figure Legends**

586 **Figure 1.** Germination rate of *cop1-5* seeds is dramatically enhanced in the presence of GA.

587 (A, B) The seedling-lethal phenotypes of *cop1-5* (8 DAI) (A) and *cop10-1* (4 DAI) (B)  
588 mutants. (C, D) Germination rates of wild-type (WT; Ws ecotype), *cop1-5*, and *cop10-1*  
589 seeds on MS medium (mock) (C) or on the same medium containing 10  $\mu$ M GA<sub>3</sub> (D).  
590 Germination rates were determined by counting the seeds with protruding radicles over 20  
591 days. The mean and SD were obtained from three biological repeats (~100 seeds/repeat).  
592 The experiments were repeated five times with similar results. DAI, day(s) after incubation  
593 to 22°C under long days; GA, gibberellin.

594

595 **Figure 2.** COP1 acts as a positive regulator in seed germination.

596 (A) Germination rates of WT (Col-0 ecotype), *cop1-4*, and *COP1-OX/cop1-4* seeds on MS  
597 phytoagar medium (mock) or on the same medium containing 10  $\mu$ M GA<sub>3</sub> or 10  $\mu$ M PAC  
598 from 0 to 10 DAI. (B) Germination scored at 1.5 DAI of the same lines and treatments as in  
599 (A). Germination rates were determined by counting the seeds with protruding radicles. The  
600 mean and SD were obtained from three independent repeats (~100 seeds/repeat). Different  
601 letters indicate significantly different values according to a one-way ANOVA and Duncan's  
602 least significant range test ( $P < 0.05$ ). (C) Germination phenotypes of WT, *cop1-4*, and  
603 *COP1-OX/cop1-4* seeds on MS medium containing 10  $\mu$ M PAC at 3 DAI. The experiments  
604 were repeated five times with similar results. DAI, day(s) after incubation to 22°C under LD;  
605 GA, gibberellin; PAC, paclobutrazol.

606

607 **Figure 3.** Expression profiles of germination-associated genes in *cop1-4* and *COP1-*  
608 *OX/cop1-4* seeds.

609 (A-D) Expression levels of germination-associated genes, *EXPA1*, *EXPA2*, *EXPA8*, and  
610 *XTH33*, in *cop1-4* and *COP1-OX/cop1-4* seeds relative to those in WT seeds. After  
611 stratification, seeds were transferred to 22°C for germination and grown in MS phytoagar  
612 (mock) or in the presence of 10  $\mu$ M PAC until 3 DAI, and analyzed by qRT-PCR. The  
613 expression level of each gene was normalized to that of *ACTIN2* (*ACT2*). Expression levels  
614 of each gene are shown relative to the expression of WT in the mock-treatment group, which

615 is set as 1. The mean and SD were obtained from three biological repeats (~30  
616 seeds/repeat). Different letters indicate significantly different values according to a one-way  
617 ANOVA and Duncan's least significant range test ( $P < 0.05$ ). The experiments were  
618 repeated three times with similar results. DAI, day(s) after incubation to 22°C under LD;  
619 PAC, paclobutrazol.

620

621 **Figure 4.** COP1 acts as an upstream regulator of RGL2 in seed germination.

622 (A) Germination rates of WT (Col-0), *cop1-4*, *rgl2-SK54*, and *cop1-4 rgl2-SK54* seeds on MS  
623 phytoagar medium (mock). (B) Germination rates of WT (Col-0), *rgl2-SK54*, *COP1-OX/cop1-*  
624 *4*, and *COP1-OX/rgl2-SK54* seeds in MS phytoagar medium containing 10 μM PAC. After 3  
625 days of stratification, the seeds were transferred to 22°C and the germination rate was  
626 determined by counting the seeds with protruding radicles at the indicated time from 0 to 10  
627 DAI. The mean and SD were obtained from three biological repeats (~100 seeds/repeat).  
628 The experiments were repeated three times with similar results. DAI, day(s) after incubation  
629 to 22°C under LD; PAC, paclobutrazol.

630

631 **Figure 5.** COP1 interacts with and destabilizes RGL2.

632 (A) Interaction of COP1 and RGL2 in Y2H assays. Full-length (FL) COP1, as well as three of  
633 its individual domains (RING, coiled-coil (CC), and WD40-repeat (WD40)), were used as  
634 baits and full-length RGL2 as prey. Selection for interaction was performed in selective  
635 media containing increasing concentrations of 3-Amino-1,2,4-Triazol (3-AT). (B) MBP-COP1  
636 pulls-down GST-RGL2 *in vitro*. Fusion proteins were detected with an anti-MBP antibody  
637 and anti-GST antibody. (C) Semi *in vivo* pull-down assays. GST-RGL2 pulls down COP1-  
638 GFP from Arabidopsis protein extracts. (D) BiFC assay showing that COP1 and RGL2  
639 interact in the presence of SPA1. The indicated constructs were expressed in *N.*  
640 *benthamiana* leaves and observed by confocal microscopy. One representative nucleus is  
641 shown. (E) Degradation of MBP-RGL2 fusion by soluble protein extracts from seedlings of  
642 different genotypes as determined with a cell-free degradation assay. MBP-RGL2 proteins  
643 were incubated for the indicated times (min) with total soluble protein extracted from 6-d-old  
644 WT (Col-0), *cop1-4*, or *COP1-OX/cop1-4* etiolated seedlings. As a control for equivalent  
645 extract amounts actin is shown. MBP when expressed alone remained stable. An anti-MBP  
646 antibody was used for fusion protein-detection. Protein levels at each time point are shown  
647 relative to those in the input sample (time 0) and normalized to the corresponding actin  
648 loading, and set as 1. The experiments were repeated three times with similar results. (F)

649 COP1 ubiquitinates RGL2 *in vitro*. RGL2 (6His-HA-RGL2-6His fusion) ubiquitination assays  
650 were performed using MBP-COP1 (or MBP MBP-COP1 without Zn<sup>2+</sup> as a negative control),  
651 rice E2 Rad6 (E2), and yeast E1 (E1; Boston Biochem). Ubiquitinated RGL2 was detected  
652 using an anti-HA antibody.

653

654 **Figure 6.** Effects of PAC on the expression of germination-associated genes in imbibed  
655 *cop1-4*, *rgl2-SK54*, and *cop1-4 rgl2-SK54* seeds.

656 Altered expression of five *RGL2*-downregulated germination-associated genes, *GASA6*,  
657 *EXPA1*, *EXPA2*, *EXPA8*, and *XTH33*, in imbibed WT (Col-0), *cop1-4*, *rgl2*, and *cop1-4 rgl2-*  
658 *SK54* seeds in the presence or absence of 10 μM PAC at 3 DAI. The expression level of  
659 each gene obtained by qRT-PCR was normalized to that of *ACTIN2* (*ACT2*) and represented  
660 relatively to the expression levels in WT under normal conditions (mock), which is set as 1.  
661 The mean and SD were obtained from three biological samples (~30 seeds/repeat). Different  
662 letters indicate significantly different values according to a one-way ANOVA and Duncan's  
663 least significant range test ( $P < 0.05$ ). DAI, day(s) after incubation to 22°C under LD; PAC,  
664 paclobutrazol.

665

666 **Figure 7.** COP1 stability is enhanced by GA and decreased by PAC.

667 (A) Relative expression levels of *COP1* in seeds stratified for 3 days at 4°C on MS medium  
668 and then transferred to 22°C. Seeds were sampled at the indicated time points after transfer.  
669 Relative expression levels of *COP1* were normalized to those of *ACTIN2* (*ACT2*). The  
670 expression levels of *COP1* are shown relative to the expression at time 0 under mock  
671 treatment, which is set as 1. In qRT-PCR analysis, the mean and SD were obtained from  
672 three biological repeats (~30 seeds/repeat). (B, C) COP1 stability is increased by GA  
673 treatment but decreased by PAC treatment. COP1 and H3 histone protein levels were  
674 detected by immunoblot analysis and relative band intensity measured by ImageJ. Protein  
675 levels of each COP1 band were normalized to the level of H3 in each lane. The protein  
676 levels for each COP1 are shown relative to the expression at time 0 under mock treatment,  
677 which is set as 1. The mean and SD were obtained from three biological repeats (~100  
678 seeds/repeat). GA, gibberellin; PAC, paclobutrazol.

679

680 **Figure 8.** Model of the COP1–RGL2 regulatory module in seed germination.

681 Upon perception of favorable environmental cues, GA is synthesized in the seeds to induce



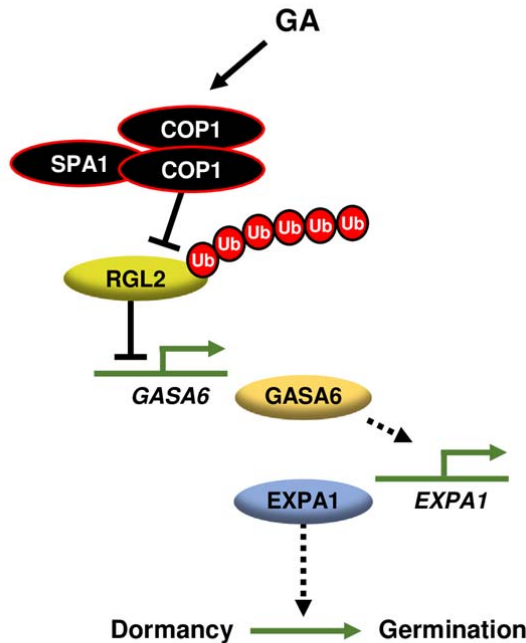

**Figure 8.** Model of the COP1–RGL2 regulatory module in seed germination.

Upon perception of favorable environmental cues, GA is synthesized in the seeds to induce germination. *COP1* is expressed, and *COP1* is stabilized by GA and interacts with RGL2, a negative regulator of the expression of germination-associated genes such as *GASA6*, *EXPA* genes, and *XTH*. The COP1–RGL2 interaction destabilizes RGL2, and consequently germination-associated genes are induced in the imbibed seeds. SPA1 is required for the *in vivo* interaction. Our model defines a non-canonical pathway by which GA inhibits RGL2 repression of seed germination through the activity of COP1. Arrows signify positive effects; blocked line, negative effect; dashed line, indirect regulation; GA, gibberellin; Ub, ubiquitin.

682 germination. *COP1* is expressed, and *COP1* is stabilized by GA and interacts with RGL2, a  
683 negative regulator of the expression of germination-associated genes such as *GASA6*,  
684 *EXPA* genes, and *XTH*. The COP1–RGL2 interaction destabilizes RGL2, and consequently  
685 germination-associated genes are induced in the imbibed seeds. SPA1 is required for the *in*  
686 *vivo* interaction. Our model defines a non-canonical pathway by which GA inhibits RGL2  
687 repression of seed germination through the activity of COP1. Arrows signify positive effects;  
688 blocked line, negative effect; dashed line, indirect regulation; GA, gibberellin; Ub, ubiquitin.

689

690

691

## Parsed Citations

- Ariizumi T, Hauvermale AL, Nelson SK, Hanada A, Yamaguchi S, Steber CM. 2013. Lifting DELLA repression of Arabidopsis seed germination by nonproteolytic gibberellin signaling. *Plant Physiology* 162(4): 2125.  
Google Scholar: [Author Only](#) [Title Only](#) [Author and Title](#)
- Ariizumi T, Steber CM. 2007. Seed germination of GA-insensitive *sleepy1* mutants does not require RGL2 protein disappearance in Arabidopsis. *Plant Cell* 19(3): 791-804.  
Google Scholar: [Author Only](#) [Title Only](#) [Author and Title](#)
- Belda-Palazón B, Ruiz L, Martí E, Tàrraga S, Tiburcio AF, Culiáñez F, Farràs R, Carrasco P, Ferrando A. 2012. Aminopropyltransferases involved in polyamine biosynthesis localize preferentially in the nucleus of plant cells. *PLoS One* 7(10):e46907.  
Google Scholar: [Author Only](#) [Title Only](#) [Author and Title](#)
- Bewley JD. 1997. Seed germination and dormancy. *Plant Cell* 9(7): 1055.  
Google Scholar: [Author Only](#) [Title Only](#) [Author and Title](#)
- Blanco-Touriñán N, Legris M, Minguet EG, Costigliolo-Rojas C, Nohales MA, Iniesto E, García-León M, Pacín M, Heucken N, Blomeier T, et al. 2020. COP1 destabilizes DELLA proteins in Arabidopsis. *PNAS* 117 (24): 13792-13799.  
Google Scholar: [Author Only](#) [Title Only](#) [Author and Title](#)
- Cañibano E, Bourbousse C, García-León M, Garnelo Gómez B, Wolff L, García-Baudino C, Lozano-Durán R, Barneche F, Rubio V, Fonseca S. 2021. DET1-mediated COP1 regulation avoids HY5 activity over second-site targets to tune plant photomorphogenesis. *Molecular Plant*. 14(6): 963-982. doi: 10.1016/j.molp.2021.03.009.  
Google Scholar: [Author Only](#) [Title Only](#) [Author and Title](#)
- Cao D, Hussain A, Cheng H, Peng J. 2005. Loss of function of four DELLA genes leads to light- and gibberellin-independent seed germination in Arabidopsis. *Planta* 223(1): 105-113.  
Google Scholar: [Author Only](#) [Title Only](#) [Author and Title](#)
- Chen H, Zhang J, Neff MM, Hong S-W, Zhang H, Deng X-W, Xiong L. 2008. Integration of light and abscisic acid signaling during seed germination and early seedling development. *Proceedings of the National Academy of Sciences* 105(11): 4495-4500.  
Google Scholar: [Author Only](#) [Title Only](#) [Author and Title](#)
- Clough SJ, Bent AF. 1998. Floral dip: a simplified method for Agrobacterium-mediated transformation of Arabidopsis thaliana. *Plant Journal* 16(6): 735-743.  
Google Scholar: [Author Only](#) [Title Only](#) [Author and Title](#)
- Curtis MD, Grossniklaus U. 2003. A gateway cloning vector set for high-throughput functional analysis of genes in planta. *Plant Physiology* 133(2):462-9  
Google Scholar: [Author Only](#) [Title Only](#) [Author and Title](#)
- Dill A, Sun T-P. 2001. Synergistic derepression of gibberellin signaling by removing RGA and GAI function in Arabidopsis thaliana. *Genetics* 159(2): 777-785.  
Google Scholar: [Author Only](#) [Title Only](#) [Author and Title](#)
- Dill A, Thomas SG, Hu J, Steber CM, Sun TP. 2004. The Arabidopsis F-box protein SLEEPY1 targets gibberellin signaling repressors for gibberellin-induced degradation. *Plant Cell* 16(6): 1392-1405.  
Google Scholar: [Author Only](#) [Title Only](#) [Author and Title](#)
- Dohmann EMN, Nill C, Schwechheimer C. 2010. DELLA proteins restrain germination and elongation growth in Arabidopsis thaliana COP9 signalosome mutants. *European journal of cell biology* 89(2-3): 163-168.  
Google Scholar: [Author Only](#) [Title Only](#) [Author and Title](#)
- Earley KW, Haag JR, Pontes O, Opper K, Juehne T, Song K, Pikaard CS. 2006. Gateway-compatible vectors for plant functional genomics and proteomics. *Plant J* 45(4): 616-629.  
Google Scholar: [Author Only](#) [Title Only](#) [Author and Title](#)
- Fernando VC, Schroeder DF. 2015. Genetic interactions between DET1 and intermediate genes in Arabidopsis ABA signalling. *Plant Science* 239:166-79.  
Google Scholar: [Author Only](#) [Title Only](#) [Author and Title](#)
- Fonseca S, Solano R. 2013. Pull-down analysis of interactions among jasmonic acid core signaling proteins. In *Jasmonate Signaling*, pp. 159-171. Humana Press, Totowa, NJ.  
Google Scholar: [Author Only](#) [Title Only](#) [Author and Title](#)
- Franciosini A, Moubayidin L, Du K, Matari Nahill H, Boccaccini A, Butera S, Vittorioso P, Sabatini S, Jenik Pablo D, Costantino P, et al. 2015. The COP9 SIGNALOSOME is required for postembryonic meristem maintenance in Arabidopsis thaliana. *Molecular Plant* 8(11): 1623-1634.  
Google Scholar: [Author Only](#) [Title Only](#) [Author and Title](#)
- Fu X, Richards DE, Fleck B, Xie D, Burton N, Harberd NP. 2004. The Arabidopsis mutant *sleepy1gar2-1* protein promotes plant growth by increasing the affinity of the SCFSLY1 E3 ubiquitin ligase for DELLA protein substrates. *Plant Cell* 16(6): 1406-1418.

Google Scholar: [Author Only](#) [Title Only](#) [Author and Title](#)

**Gabriele S, Rizza A, Martone J, Circelli P, Costantino P, Vittorioso P. 2010. The Dof protein DAG1 mediates PIL5 activity on seed germination by negatively regulating GA biosynthetic gene AtGA3ox1. Plant Journal 61(2): 312-323.**

Google Scholar: [Author Only](#) [Title Only](#) [Author and Title](#)

**Holdsworth MJ, Bentsink L, Soppe WJ. 2008. Molecular networks regulating Arabidopsis seed maturation, after-ripening, dormancy and germination. New Phytologist 179(1): 33-54.**

Google Scholar: [Author Only](#) [Title Only](#) [Author and Title](#)

**Jin D, Wu M, Li B, Buckner B, Keil P, Zhang S, Li J, Kang D, Liu J, Dong J, et al. 2018. The COP9 Signalosome regulates seed germination by facilitating protein degradation of RGL2 and ABI5. PLoS Genetics 14(2): e1007237.**

Google Scholar: [Author Only](#) [Title Only](#) [Author and Title](#)

**Koornneef M, van der Veen JH. 1980. Induction and analysis of gibberellin sensitive mutants in Arabidopsis thaliana (L.) heyhn. Theoretical and Applied Genetics 58(6): 257-263.**

Google Scholar: [Author Only](#) [Title Only](#) [Author and Title](#)

**Lau OS, Deng XW. 2012. The photomorphogenic repressors COP1 and DET1: 20 years later. Trends in Plant Science 17(10): 584-593.**

Google Scholar: [Author Only](#) [Title Only](#) [Author and Title](#)

**Lee B-D, Kim MR, Kang M-Y, Cha J-Y, Han S-H, Nawkar GM, Sakuraba Y, Lee SY, Imaizumi T, McClung CR, et al. 2017. The F-box protein FKF1 inhibits dimerization of COP1 in the control of photoperiodic flowering. Nature Communications 8(1): 2259.**

Google Scholar: [Author Only](#) [Title Only](#) [Author and Title](#)

**Lee S, Cheng H, King KE, Wang W, He Y, Hussain A, Lo J, Harberd NP, Peng J. 2002. Gibberellin regulates Arabidopsis seed germination via RGL2, a GAI/RGA-like gene whose expression is up-regulated following imbibition. Genes and Development 16(5): 646-658.**

Google Scholar: [Author Only](#) [Title Only](#) [Author and Title](#)

**Liu X, Hu P, Huang M, Tang Y, Li Y, Li L, Hou X. 2016. The NF-YC-RGL2 module integrates GA and ABA signalling to regulate seed germination in Arabidopsis. Nature Communications 7: 12768.**

Google Scholar: [Author Only](#) [Title Only](#) [Author and Title](#)

**Maier A, Schrader A, Kokkelink L, Falke C, Welter B, Iniesto E, Rubio V, Uhrig JF, Hülskamp M, Hoecker U. 2013. Light and the E3 ubiquitin ligase COP1/SPA control the protein stability of the MYB transcription factors PAP1 and PAP2 involved in anthocyanin accumulation in Arabidopsis. Plant Journal 74(4): 638-651.**

Google Scholar: [Author Only](#) [Title Only](#) [Author and Title](#)

**McGinnis KM, Thomas SG, Soule JD, Strader LC, Zale JM, Sun TP, Steber CM. 2003. The Arabidopsis SLEEPY1 gene encodes a putative F-box subunit of an SCF E3 ubiquitin ligase. Plant Cell 15(5): 1120-1130.**

Google Scholar: [Author Only](#) [Title Only](#) [Author and Title](#)

**McNeillis TW, von Arnim AG, Deng XW. 1994. Overexpression of Arabidopsis COP1 results in partial suppression of light-mediated development: evidence for a light-inactivable repressor of photomorphogenesis. Plant Cell 6(10): 1391-1400.**

Google Scholar: [Author Only](#) [Title Only](#) [Author and Title](#)

**Murase K, Hirano Y, Sun T-P, Hakoshima T. 2008. Gibberellin-induced DELLA recognition by the gibberellin receptor GID1. Nature 456(7221): 459.**

**Oh E, Kang H, Yamaguchi S, Park J, Lee D, Kamiya Y, Choi G. 2009. Genome-wide analysis of genes targeted by PHYTOCHROME INTERACTING FACTOR 3-LIKE5 during seed germination in Arabidopsis. Plant Cell 21(2): 403-419.**

Google Scholar: [Author Only](#) [Title Only](#) [Author and Title](#)

**Oh E, Kim J, Park E, Kim J-I, Kang C, Choi G. 2004. PIL5, a phytochrome-interacting basic helix-loop-helix protein, is a key negative regulator of seed germination in Arabidopsis thaliana. Plant Cell 16(11): 3045-3058.**

Google Scholar: [Author Only](#) [Title Only](#) [Author and Title](#)

**Oh E, Yamaguchi S, Hu J, Yusuke J, Jung B, Paik I, Lee H-S, Sun T-P, Kamiya Y, Choi G. 2007. PIL5, a phytochrome-interacting bHLH protein, regulates gibberellin responsiveness by binding directly to the GAI and RGA promoters in Arabidopsis seeds. Plant Cell 19(4): 1192-1208.**

Google Scholar: [Author Only](#) [Title Only](#) [Author and Title](#)

**Oh E, Yamaguchi S, Kamiya Y, Bae G, Chung W, Choi G. 2006. Light activates the degradation of PIL5 protein to promote seed germination through gibberellin in Arabidopsis. Plant Journal 47(1): 124-139.**

Google Scholar: [Author Only](#) [Title Only](#) [Author and Title](#)

**Osterlund MT, Hardtke CS, Wei N, Deng XW. 2000. Targeted destabilization of HY5 during light-regulated development of Arabidopsis. Nature 405(6785): 462-466.**

**Park J, Lee N, Kim W, Lim S, Choi G. 2011. ABI3 and PIL5 collaboratively activate the expression of SOMNUS by directly binding to its promoter in imbibed Arabidopsis seeds. Plant Cell 23(4): 1404-1415.**

Google Scholar: [Author Only](#) [Title Only](#) [Author and Title](#)

**Peng J, Carol P, Richards DE, King KE, Cowling RJ, Murphy GP, Harberd NP. 1997. The Arabidopsis GAI gene defines a signaling pathway that negatively regulates gibberellin responses. *Genes and Development* 11(23): 3194-3205.**

Google Scholar: [Author Only Title Only Author and Title](#)

**Penfield S, Li Y, Gilday AD, Graham S, Graham IA. 2006. Arabidopsis ABA INSENSITIVE4 regulates lipid mobilization in the embryo and reveals repression of seed germination by the endosperm. *Plant Cell* 18: 1887–1899**

Google Scholar: [Author Only Title Only Author and Title](#)

**Piskurewicz U, Jikumaru Y, Kinoshita N, Nambara E, Kamiya Y, Lopez-Molina L. 2008. The gibberellic acid signaling repressor RGL2 inhibits Arabidopsis seed germination by stimulating abscisic acid synthesis and ABI5 activity. *Plant Cell* 20(10): 2729-2745.**

Google Scholar: [Author Only Title Only Author and Title](#)

**Ravindran P, Verma V, Stamm P, Kumar PP. 2017. A Novel RGL2-DOF6 Complex Contributes to Primary Seed Dormancy in Arabidopsis thaliana by Regulating a GATA Transcription Factor. *Molecular Plant* 10(10): 1307-1320.**

Google Scholar: [Author Only Title Only Author and Title](#)

**Rombolá-Caldentey B, Rueda-Romero P, Iglesias-Fernández R, Carbonero P, Oñate-Sánchez L. 2014. Arabidopsis DELLA and two HD-ZIP transcription factors regulate GA signaling in the epidermis through the L1 box cis-element. *Plant Cell* 26(7):2905-19.**

Google Scholar: [Author Only Title Only Author and Title](#)

**Saijo Y, Sullivan JA, Wang H, Yang J, Shen Y, Rubio V, Ma L, Hoecker U, Deng XW. 2003. The COP1-SPA1 interaction defines a critical step in phytochrome A-mediated regulation of HY5 activity. *Genes and Development* 17:2642–2647.**

Google Scholar: [Author Only Title Only Author and Title](#)

**Sanchez-Montesino R, Bouza-Morcillo L, Marquez J, Ghita M, Duran-Nebreda S, Gomez L, Holdsworth MJ, Bassel G, Onate-Sanchez L. 2019. A regulatory module controlling GA-mediated endospermic expansion is critical for seed germination in Arabidopsis. *Molecular Plant* 12(1): 71-85.**

Google Scholar: [Author Only Title Only Author and Title](#)

**Seo M, Nambara E, Choi G, Yamaguchi S. 2009. Interaction of light and hormone signals in germinating seeds. *Plant Molecular Biology* 69(4): 463-472.**

Google Scholar: [Author Only Title Only Author and Title](#)

**Shi H, Zhong S, Mo X, Liu N, Nezames CD, Deng XW. 2013. HFR1 sequesters PIF1 to govern the transcriptional network underlying light-initiated seed germination in Arabidopsis. *Plant Cell* 25(10): 3770-3784.**

Google Scholar: [Author Only Title Only Author and Title](#)

**Shimada A, Ueguchi-Tanaka M, Nakatsu T, Nakajima M, Naoe Y, Ohmiya H, Kato H, Matsuoka M. 2008. Structural basis for gibberellin recognition by its receptor GID1. *Nature* 456(7221): 520-523.**

**Stacey MG, Hicks SN, Von Arnim AG. 1999. Discrete domains mediate the light-responsive nuclear and cytoplasmic localization of Arabidopsis COP1. *Plant Cell* 11(3): 349-363.**

Google Scholar: [Author Only Title Only Author and Title](#)

**Stamm P, Ravindran P, Mohanty B, Tan EL, Yu H, Kumar PP. 2012. Insights into the molecular mechanism of RGL2-mediated inhibition of seed germination in Arabidopsis thaliana. *BMC Plant Biology* 12: 179-179.**

Google Scholar: [Author Only Title Only Author and Title](#)

**Steber CM, Cooney SE, McCourt P. 1998. Isolation of the GA-response mutant sly1 as a suppressor of ABI1-1 in Arabidopsis thaliana. *Genetics* 149(2): 509-521.**

Google Scholar: [Author Only Title Only Author and Title](#)

**Sun T-P. 2010. Gibberellin-GID1-DELLA: A pivotal regulatory module for plant growth and development. *Plant Physiology* 154(2): 567.**

Google Scholar: [Author Only Title Only Author and Title](#)

**Tyler L, Thomas SG, Hu J, Dill A, Alonso JM, Ecker JR, Sun T-P. 2004. DELLA proteins and gibberellin-regulated seed germination and floral development in Arabidopsis. *Plant Physiology* 135(2): 1008.**

Google Scholar: [Author Only Title Only Author and Title](#)

**Ueguchi-Tanaka M, Ashikari M, Nakajima M, Itoh H, Katoh E, Kobayashi M, Chow TY, Hsing YI, Kitano H, Yamaguchi I, et al. 2005. GIBBERELLIN INSENSITIVE DWARF1 encodes a soluble receptor for gibberellin. *Nature* 437(7059): 693-698.**

**Voinnet O, Rivas S, Mestre P, Baulcombe D. 2003. An enhanced transient expression system in plants based on suppression of gene silencing by the p19 protein of tomato bushy stunt virus. *Plant Journal* 33(5):949-56**

Google Scholar: [Author Only Title Only Author and Title](#)

**Wei N, Chamovitz DA, Deng XW. 1994. Arabidopsis COP9 is a component of a novel signaling complex mediating light control of development. *Cell* 78:117–124.**

Google Scholar: [Author Only Title Only Author and Title](#)

**Wei N, Deng XW. 2003. The COP9 signalosome. *Annual Review of Cell and Developmental Biology* 19:261-86.**

Google Scholar: [Author Only Title Only Author and Title](#)

**Weitbrecht K, Müller K, Leubner-Metzger G. 2011. First off the mark: early seed germination. *Journal of Experimental Botany* 62(10):**

3289-3309.

Google Scholar: [Author Only](#) [Title Only](#) [Author and Title](#)

**Wen CK, Chang C. 2002. Arabidopsis RGL1 encodes a negative regulator of gibberellin responses. Plant Cell 14(1):87-100.**

Google Scholar: [Author Only](#) [Title Only](#) [Author and Title](#)

**Xu X, Paik I, Zhu L, Bu Q, Huang X, Deng XW, Huq E. 2014. PHYTOCHROME INTERACTING FACTOR1 enhances the E3 ligase activity of CONSTITUTIVE PHOTOMORPHOGENIC1 to synergistically repress photomorphogenesis in Arabidopsis. Plant Cell 26(5): 1992.**

Google Scholar: [Author Only](#) [Title Only](#) [Author and Title](#)

**Yadukrishnan P, Rahul PV, Datta S. 2020. HY5 suppresses, rather than promotes, abscisic acid-mediated inhibition of postgermination seedling development. Plant Physiology 184(2): 574–578.**

Google Scholar: [Author Only](#) [Title Only](#) [Author and Title](#)

**Yadukrishnan P, Rahul PV, Ravindran N, Bursch K, Johansson H, Datta, S. 2020. CONSTITUTIVELY PHOTOMORPHOGENIC1 promotes ABA-mediated inhibition of post-germination seedling establishment. Plant Journal, 103: 481-496.**

Google Scholar: [Author Only](#) [Title Only](#) [Author and Title](#)

**Yan A, Wu M, Yan L, Hu R, Ai I, Gan Y. 2014. AtEXP2 is involved in seed germination and abiotic stress response in Arabidopsis. PLoS One 9: e85208.**

Google Scholar: [Author Only](#) [Title Only](#) [Author and Title](#)

**Yu JW, Rubio V, Lee NY, Bai S, Lee SY, Kim SS, Liu L, Zhang Y, Irigoyen ML, Sullivan JA, et al. 2008. COP1 and ELF3 control circadian function and photoperiodic flowering by regulating GI stability. Molecular Cell 32(5): 617-630.**

Google Scholar: [Author Only](#) [Title Only](#) [Author and Title](#)

**Yu Y, Wang J, Shi H, Gu J, Dong J, Deng XW, Huang R. 2016. Salt stress and ethylene antagonistically regulate nucleocytoplasmic partitioning of COP1 to control seed germination. Plant Physiology 170(4): 2340-2350.**

Google Scholar: [Author Only](#) [Title Only](#) [Author and Title](#)

**Zhong C, Xu H, Ye S, Wang S, Li L, Zhang S, Wang X. 2015. Gibberellic acid-stimulated Arabidopsis6 serves as an integrator of gibberellin, abscisic acid, and glucose signaling during seed germination in Arabidopsis. Plant Physiology 169(3): 2288-2303.**

Google Scholar: [Author Only](#) [Title Only](#) [Author and Title](#)

**Zhu L, Bu Q, Xu X, Paik I, Huang X, Hoecker U, Deng XW, Huq E. 2015. CUL4 forms an E3 ligase with COP1 and SPA to promote light-induced degradation of PIF1. Nature Communications 6: 7245.**

Google Scholar: [Author Only](#) [Title Only](#) [Author and Title](#)
